# Supplementary material for: AKAP12 regulates vascular integrity in zebrafish
Source: PubMed Central journal article supplement — Exp Mol Med. 2011 Dec 22;44(3):225–35. doi: 10.3858/emm.2012.44.3.017 (PMC3317486; doi:10.3858/emm.2012.44.3.017), 2011-12-22
Supplement: emm-44-225-s001.pdf [file emm-44-225-s001.pdf]

## **Supplemental Data**

### **Methods**

#### **TUNEL staining**

The TUNEL cell death assay was carried out using the "In Situ Cell Death Detection Kit" TMR red (Roche, Indianapolis, IN, USA) according to manufacturer's instructions.

#### ***In vitro* tube formation**

HUVEC were maintained in EBM-2 medium supplemented with EGM-2. Tube formation assay on extracellular BD matrigel was performed according to the manufacturer's protocol with minor modifications.  $2 \times 10^4$  of HUVECs were resuspended with 500  $\mu$ l of EBM-2 medium and were seeded on Matrixgel solidified in 48-wel tissue culture plate. Cells were incubated in a CO<sub>2</sub> incubator for 24 hrs at 37°C and then examined for tube formation with a light microscope.

#### **RT-PCR**

For RT-PCR, total mRNA was isolated from wild-type zebrafish embryos at several stages (24, 36, 48, and 72 hpf). Two specific forward primers that correspond to the N-terminal and a reverse primer to the C-terminal of zebrafish akap12 isoforms were used. Following primers were used in this study: akap12  $\alpha$  forward primer (ATGGGAGCGACACCATCCG), akap12  $\beta$  forward primer (ATGCTTGGGACAATAACTCTAACAG), akap12 reverse primer (TGAGGCCTGTCTTCTGTTGA),  $\beta$ -actin forward primer (GATCTTCACTCCCCTTGTTAC) and  $\beta$ -actin reverse primer (CACAGCTTCTCCTTGATGTCAC).

#### **In situ hybridization (ISH)**

For ISH, wild-type zebrafish embryos at several stages (24, 48, and 72 hpf) were used. Due to the small size of the specific sequence for each akap12 isoform (akap12 $\alpha$ , 212 nt; akap12 $\beta$ , 23 nt), we designed a pan-akap12 probe. To generate the *akap12* riboprobe, 2256 base pairs of the conserved region of akap12 $\alpha$  and - $\beta$  were cloned into the pGEM-T Easy vector (Promega, WI, USA). A DIG-labeled akap12 antisense riboprobe was synthesized using a DIG RNA labeling

kit (Roche, IN, USA). Standard ISH was performed as described (Oxtoby and Jowett, 1993; Strähle et al., 1994).

### **Translation blocking Morpholino (MO) specificity test**

Zebrafish akap12 isoforms, akap12 $\alpha$  and akap12 $\beta$ , are cloned into pEGFP-N3 vector (Clontech, CA, USA) and amplified by PCR using specific primer containing SP6 promoter sequence for *in vitro* transcription. *In vitro* transcribed mRNAs (*akap12 $\alpha$ -gfp*, 25pg; *akap12 $\beta$ -gfp*, 25pg) and translation blocking MOs (akap12 $\alpha$ , 2ng; akap12 $\beta$ , 7.5ng) are injected into zebrafish embryos at 1 to 4-cell stage and then acquired the fluorescence image at 24hpf. Following primers were used in this study: forward primer (SP6) (TTGATTTAGGTGACACTATAGAGCGCTACCG GACTCAGATCTC), reverse primer (T TACTTGTACAGCTCGRCCATGC).

## Figure Legends

### Supplemental Figure 1. Construction of morpholino and probe for akap12

A-B, The genetic map of zebrafish *akap12* $\alpha$  and  $\beta$  (A). The arched lines connecting the exons represent the splicing of the two *akap12* mRNAs. The *akap12* $\alpha$  includes exons 1, 2 and 4. The *akap12* $\beta$  includes exons 3 and 4. Target regions of MOs were indicated by green bar for splicing blocker (MO1), by red bar for translation blocker (MO2), respectively. *Akap12* mRNA probe for ISH was designed on the basis of *akap12*-genetic map (blue bar). RT-PCR analyses for *akap12* isoform (B). The efficiency of MO1 for *akap12* was examined by using specific primer for each *akap12* isoform (green arrow) (A). C, The efficacy of *akap12* MO2 was examined by the co-injection of in vitro transcribed *akap12-gfp* mRNA (*akap12* $\alpha$ -*gfp*, 25pg; *akap12* $\beta$ -*gfp*, 25pg) and *akap12* MO2 ( $\alpha$  MO2, 2ng;  $\beta$ MO2, 7.5ng). Note that the expression of GFP was blocked by injecting *akap12* MO2. D-E, Lateral view of *akap12* morphants with normal trunk (D) and with trunk defect (E). Hemorrhages were indicated by red arrows.  $\alpha$ F, *akap12* $\alpha$  forward primer;  $\beta$ F, *akap12* $\beta$  forward primer;  $\alpha\beta$ R, reverse primer for *akap12* $\alpha$  and *akap12* $\beta$ , MO1, splicing blocking MO; MO2, translation blocking MO; N, normal trunk; TD, trunk defect.

### Supplemental Figure 2. Hemorrhages are not caused by vessel regression

Confocal images of the TUNEL stained Tg(*fli1a:EGFP*)y1 zebrafish embryos (Ctl MO, 7.5ng;  $\alpha$  MO1, 2ng;  $\beta$ MO1, 7.5ng) at 48 hpf. TUNEL positive signals were indicated by red dots. White boxed regions with numbers were enlarged. Yellow boxed regions were projected with different angles (2'R, 286°; 4'R, 107°; 5'R, 101°; 6'R, 101°) using Zeiss LSM program. Note that there were no differences in TUNEL positive signals between control and *akap12* morphants. Scale bar, 100um. R, rotation.

### Supplemental Figure 3. PAK2 and AF6-depleted HUVECs show the failure in tube formation

A, Immunoblots. HUVECs were treated with 10nmol/L siRNA for AKAP12 and immunostained with anti-AKAP12. B and C, *in vitro* tube formation assay. Note that capillary tubes in PAK2 and AF6-depleted HUVECs were broken. D and E, RT-PCR analysis using *akap12* morphant at 48hpf (D) and AKAP12 depleted HUVECs after 48hours after siRNA transfection (E).

## Supplementary table legend

### Supplemental table 1. Statistics of hemorrhages of *akap12* morphant

Incidence of hemorrhages was examined at 48-72hpf. Note that number in parenthesis indicates

embryos with trunk defects.

**Supplemental table 2.** Statistics of *akap12* mRNA rescue experiment

Incidence of hemorrhages was examined at 48-72hpf. Note that number in parenthesis indicates the amount of injected *akap12* mRNA.

**Supplemental table 3.** Statistics of *PAK2* and *AF6* mRNA rescue experiment

Incidence of hemorrhages was examined at 48-72hpf. Note that number in parenthesis indicates the amount of injected MOs.



# Supplemental Figure 1.

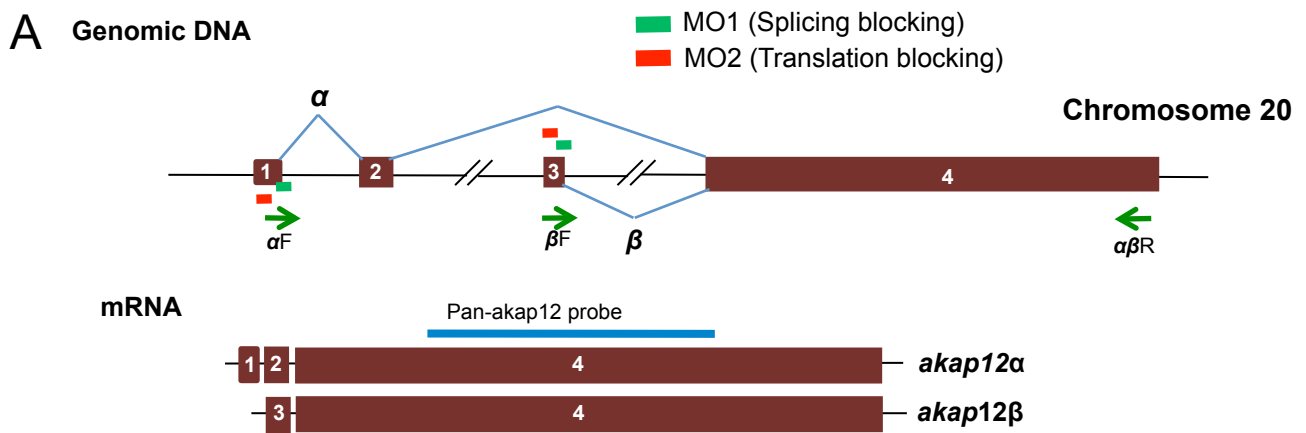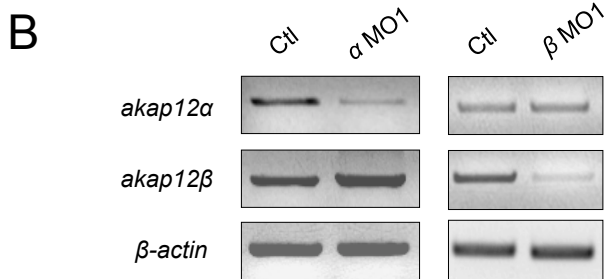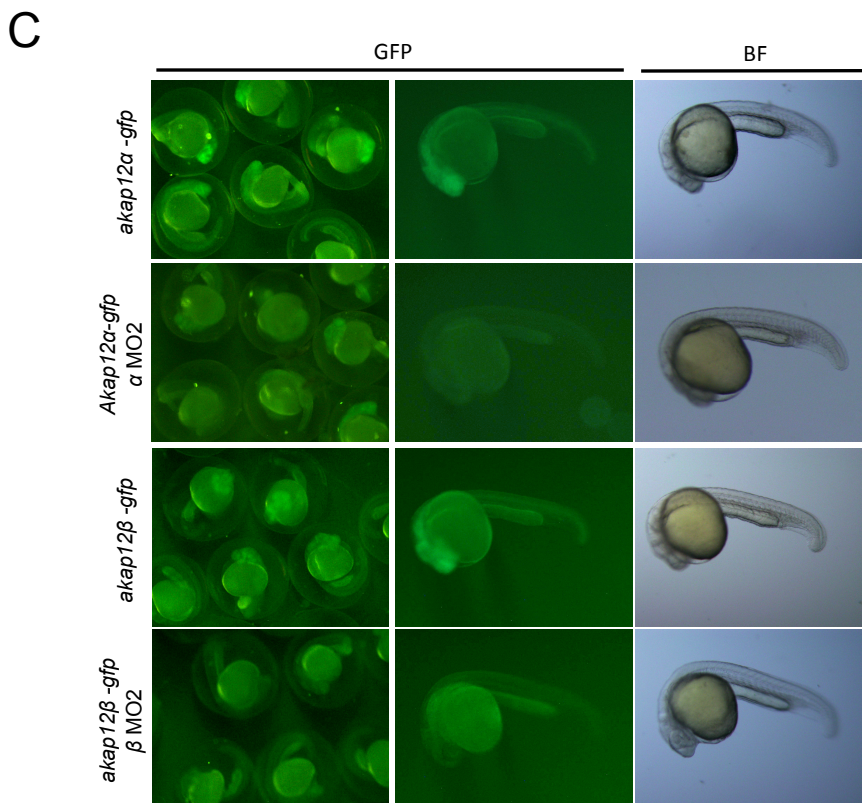

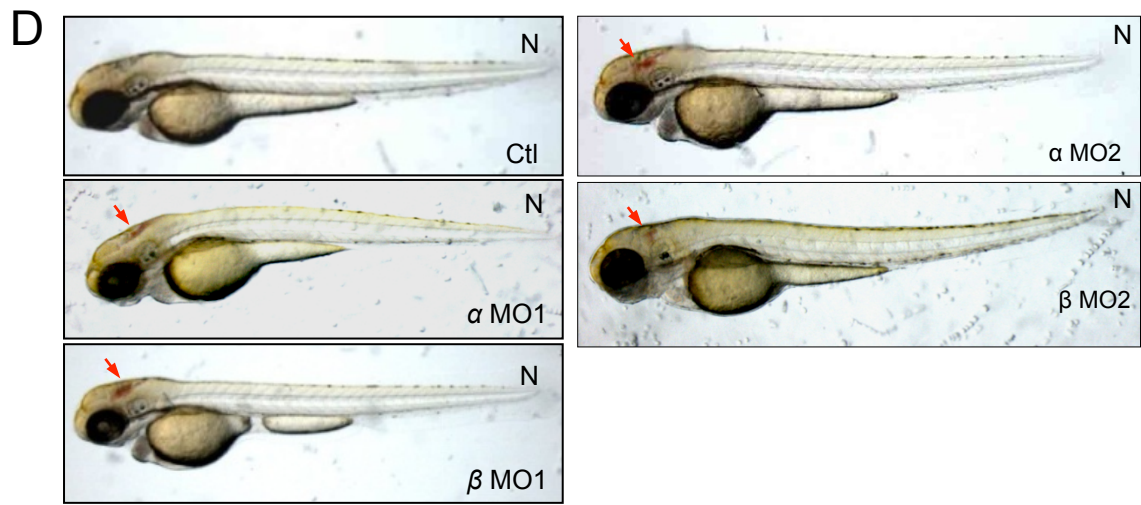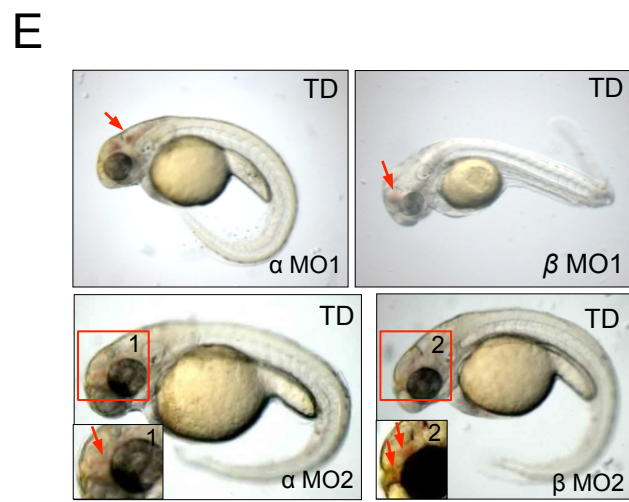

## Supplemental Figure 2.

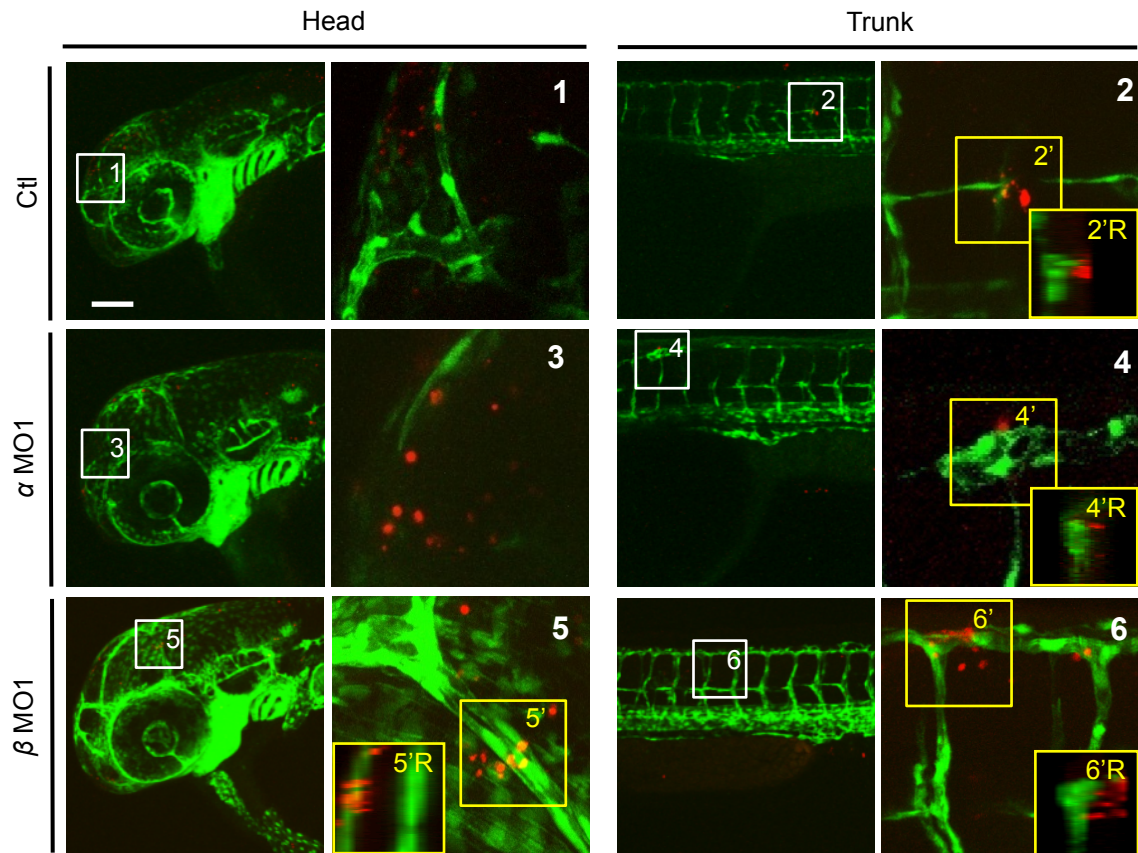

### Supplemental Figure 3.

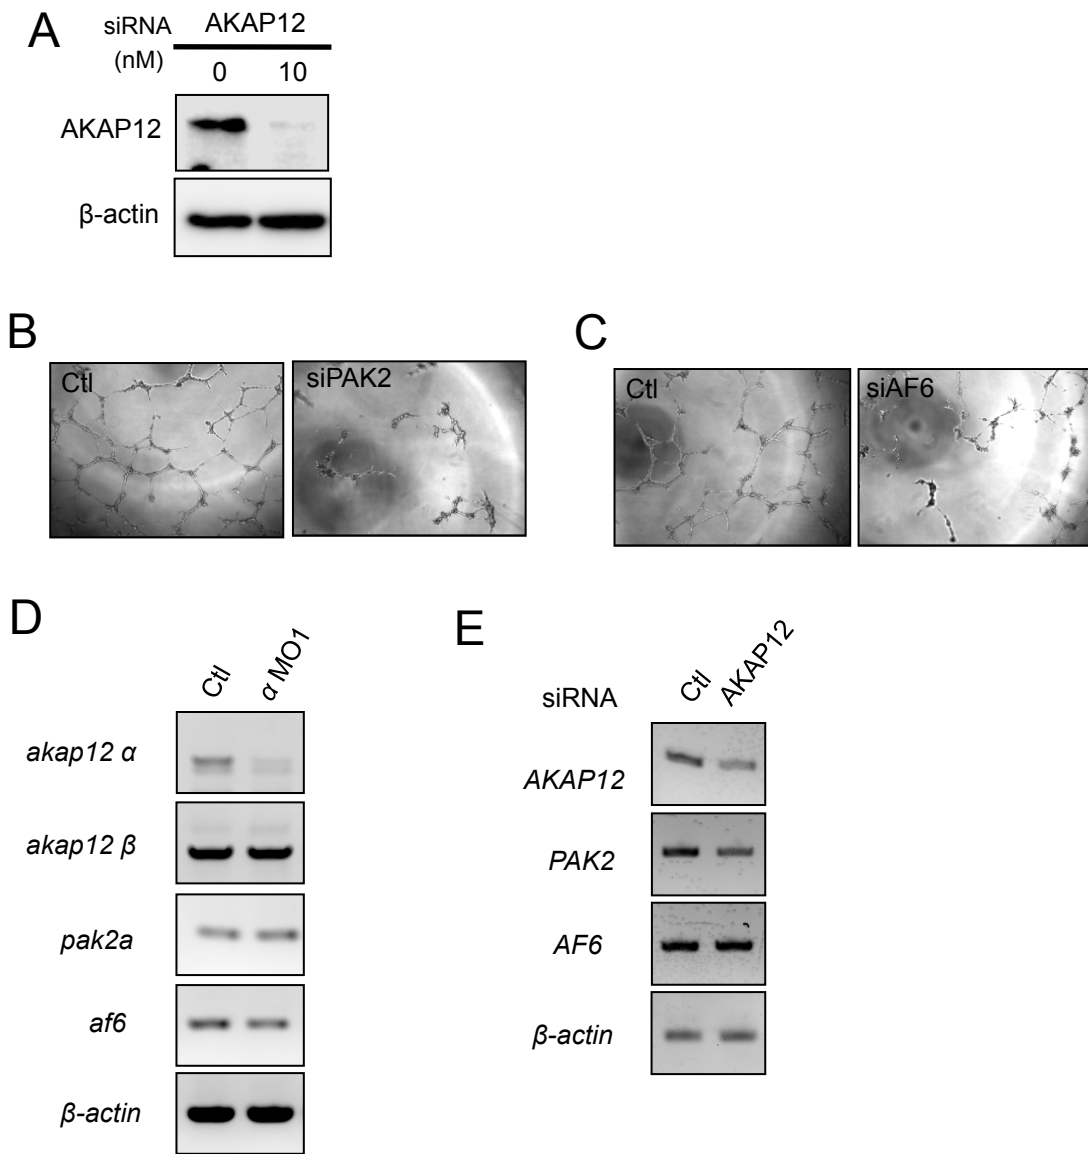

## Supplemental Table 1.

| MO           | ng  | Number of embryos |            |      |       | Percentage (%) |                |      |
|--------------|-----|-------------------|------------|------|-------|----------------|----------------|------|
|              |     | Hemo              | Non-hemo   | Dead | Total | Hemo           | Non-hemo       | Dead |
| Ctl          | 0   | 0<br>(0)          | 96<br>(0)  | 2    | 98    | 0<br>(0)       | 98.0<br>(0)    | 2.0  |
|              | 13  | 0<br>(0)          | 75<br>(0)  | 1    | 76    | 0<br>(0)       | 98.7<br>(0)    | 1.3  |
| $\alpha$ MO1 | 0.6 | 28<br>(6)         | 90<br>(32) | 1    | 119   | 23.5<br>(5.0)  | 75.6<br>(26.9) | 0.8  |
|              | 2   | 46<br>(28)        | 56<br>(16) | 3    | 105   | 43.8<br>(26.7) | 53.3<br>(15.2) | 2.9  |
|              | 3   | 1<br>(1)          | 64<br>(58) | 7    | 72    | 1.4<br>(1.4)   | 88.9<br>(80.6) | 9.7  |
| $\beta$ MO1  | 4.5 | 14<br>(4)         | 70<br>(28) | 2    | 86    | 16.3<br>(4.7)  | 81.4<br>(32.6) | 2.3  |
|              | 9   | 11<br>(5)         | 52<br>(27) | 8    | 71    | 15.5<br>(7.0)  | 73.2<br>(38.0) | 11.3 |
|              | 13  | 6<br>(2)          | 36<br>(28) | 12   | 54    | 11.1<br>(3.7)  | 66.7<br>(51.9) | 22.2 |

( ), Trunk defect embryos

## Supplemental Table 2.

| MO<br>(ng)     | mRNA<br>(pg)           | Number of embryos |          |      |       | Percentage (%) |          |      |
|----------------|------------------------|-------------------|----------|------|-------|----------------|----------|------|
|                |                        | Hemo              | Non-hemo | Dead | Total | Hemo           | Non-hemo | Dead |
| Ctl<br>(7.5)   | None<br>(0)            | 0                 | 132      | 1    | 133   | 0              | 99.2     | 0.8  |
|                | <i>akap12α</i><br>(50) | 1                 | 86       | 2    | 89    | 1.1            | 96.6     | 2.2  |
|                | <i>akap12β</i><br>(50) | 0                 | 93       | 3    | 96    | 0              | 96.9     | 3.1  |
| α MO1<br>(2)   | None<br>(0)            | 51                | 56       | 3    | 110   | 46.4           | 50.9     | 2.7  |
|                | <i>akap12α</i><br>(50) | 7                 | 83       | 3    | 93    | 7.5            | 89.2     | 3.2  |
| β MO1<br>(7.5) | None<br>(0)            | 21                | 72       | 5    | 98    | 21.4           | 73.5     | 5.1  |
|                | <i>akap12β</i><br>(50) | 8                 | 64       | 3    | 75    | 10.7           | 85.3     | 4    |

**Supplemental Table 3.**

| MO<br>(ng)           | mRNA*             | Number of embryos |          |      |       | Percentage (%) |          |      |
|----------------------|-------------------|-------------------|----------|------|-------|----------------|----------|------|
|                      |                   | Hemo              | Non-hemo | Dead | Total | Hemo           | Non-hemo | Dead |
| Ctl<br>(0)           | <i>None</i>       | 0                 | 83       | 0    | 83    | 0.0            | 100      | 0    |
|                      | <i>PAK2</i>       | 0                 | 59       | 1    | 60    | 0.0            | 98.3     | 1.7  |
|                      | <i>AF6</i>        | 0                 | 73       | 1    | 74    | 0.0            | 98.6     | 1.4  |
|                      | <i>PAK2 + AF6</i> | 0                 | 70       | 0    | 70    | 0.0            | 100      | 0    |
| $\alpha$ MO1<br>(2)  | <i>None</i>       | 15                | 33       | 1    | 49    | 30.6           | 67.3     | 2.0  |
|                      | <i>PAK2</i>       | 4                 | 56       | 1    | 61    | 6.6            | 91.8     | 1.6  |
|                      | <i>AF6</i>        | 1                 | 75       | 3    | 79    | 1.3            | 94.9     | 3.8  |
|                      | <i>PAK2+ AF6</i>  | 7                 | 89       | 2    | 98    | 7.1            | 90.8     | 2.0  |
| $\beta$ MO1<br>(7.5) | <i>None</i>       | 6                 | 39       | 2    | 47    | 12.8           | 83.0     | 4.3  |
|                      | <i>PAK2</i>       | 1                 | 54       | 3    | 58    | 1.7            | 93.1     | 5.2  |
|                      | <i>AF6</i>        | 3                 | 74       | 4    | 81    | 3.7            | 91.4     | 4.9  |
|                      | <i>PAK2+ AF6</i>  | 3                 | 78       | 2    | 83    | 3.6            | 94.0     | 2.4  |

\* *PAK2*, 25  $\mu$ g; *AF6*, 25  $\mu$ g
